# Supplementary material
Source: publisher figshare collection journal article supplement (https://sage.figshare.com/ndownloader/files/20186394)
Supplement: Supplementary file 1 [file 20186394]

## Sheet: Sheet1
Study	Country	Setting	Region	Diagnostic Guide	Setting	Design	Design (2)	Control	Initial Sample Size	Final Sample Size	Females (n)	Males (n)	Males (%)	Age (mean)	Dementias Included	Alzheimer's (%)	Vascular (%)	Mixed (%)	FTD (%)	Unspecified (%)	Mean Baseline MMSE	Antipsychotics (%)	Duration (weeks)	Indication for Treatment	Prior NPS Treatment	Intervention	Dose	Outcomes	NPI	CMAI	MMSE	CGI	GAF	PAS	Completed	Dropouts	Reasons	Adverse Events
Volicer et al., 1997	USA	Hospital	North America	DSM-III-R	Hospital dementia study unit	Randomized, DB, PC, crossover trial	Randomized	Placebo	15	12	1	14	93.3333	72.7 (4.9)	Alzheimer’s disease	100	0	0	0	0	4.0 (7.4)	27	12	Food refusal	Not reported	Dronabinol	2.5 mg po BID	CMAI, MMSE	No	Yes	Yes	No	No	No	12	3	Seizure (n=1), infection (n=2)	Seizure (n=1), infection (n=2)
Walther et al., 2006	Germany	Hospital	Europe	DSM-IV	Hospital	Retrospective systematic chart review (pre–post intervention)	Quasi-randomized	N/A	6	6	4	2	33.3333	81.5 (6.1)	Alzheimer’s disease, vascular	83	17	0	0	0	10.3 (6.3)	67	2	Nighttime agitation, daytime rhythm disturbances/sundowning	Not explicitly stated; four patients taking psychotropic medications (risperidone, carbamazepine, donepezil, galantamine, mirtazapine or chloral hydrate); these continued throughout trial.	Dronabinol	2.5 mg po qHs	NPI, MMSE, CGI, Actigraphy	Yes	Yes	Yes	Yes	No	No	6	0	N/A	No serious adverse events reported
Mahlberg & Walther, 2007	Germany	Hospital	Europe	NINCDS-ADRDA	Hospital	Randomized, SB, PC, parallel trial	Randomized	Placebo	24	24	14	10	41.6667	78.6 (9.7)	Alzheimer’s disease	100	0	0	0	0	N/R	N/R	2	Agitation, aggression or resistance to care	Not reported	Dronabinol	2.5 mg po qHs	Actigraphy, NPI	Yes	No	No	No	No	No	24	0	N/A	No serious adverse events reported
Walther et al., 2011	Switzerland	Hospital	Europe	DSM-IV	Hospital	Randomized, DB, PC, crossover trial	Randomized	Placebo	2	2	0	2	100	78.0 (4.2)	Alzheimer’s disease	100	0	0	0	0	19.5 (3.5)	0	4	Circadian rhythm disturbances, verbal aggression, delusions and apathy	Not reported. No psychotropics listed in regular medications.	Dronabinol	2.5 mg po qHs	MMSE, CMAI	No	Yes	Yes	No	No	No	2	0	N/A	No serious adverse events reported
Woodward et al., 2014	USA	Hospital	North America	DSM-IV-TR	Hospital	Retrospective systematic chart review (pre--post intervention)	Quasi-randomized	N/A	40	40	28	12	30	N/R	Alzheimer’s disease, vascular, frontotemporal and mixed	33	18	38	3	8	7.0 (Not reported)	93	2.5	Agitation, aggression or resistance to care	Not explicitly stated; 92.5% had at least one psychotropic medication (average of 3.25 at baseline)	Dronabinol	7.0 mg po OD	CGI, PAS, GAF	No	Yes	No	Yes	Yes	Yes	40	0	N/A	Sedation (n=9), delirium (n=4), UTI (n=3), and confusion (n=2)
van den Elsen et al., 2015	Netherlands	Community and nursing home	Europe	NINCDS-ADRDA	Community and nursing home	Randomized DB PC multicentre phase II trial	Randomized	Placebo	50	50	25	25	50	78.4 (7.4)	Alzheimer’s disease, vascular and mixed	68	14	18	0	0	15.0 (6.8)	20	3	Agitation, aggression, and aberrant motor behavior; NPI ≥10	Participants were on a range of antipsychotics, antidepressants, benzodiazepines, and anticonvulsants	THC (Namisol®)	1.5 mg po TID	NPI, CMAI	Yes	Yes	No	No	No	No	50	0	Pneumonia (n=1), dysphagia (n=1)	Pneumonia (n=1), dysphagia (n=1)
van den Elsen et al., 2015b	Netherlands	Hospital and community	Europe	NINCDS-ADRDA	Hospital and community	Randomized DB PC repeated crossover trial	Randomized	Placebo	22	20	7	15	68.1818	76.4 (5.3)	Alzheimer’s disease, vascular and mixed	82	4	14	0	0	16.9 (7.8)	9	12	Agitation and aggression; NPI ≥10	Participants were on a range of antipsychotics, antidepressants, benzodiazepines, and anticonvulsants	THC (Namisol®)	0.75-1.5 mg po BID	NPI, CMAI	Yes	Yes	No	No	No	No	20	2	Malignancy (n=1), excess PRN use (n=1)	Malignancy (n=1), excess PRN use (n=1)
Shelef et al., 2016	Israel	Hospital	Europe	DSM-IV	Hospital	Open-label prospective cohort study (pre--post intervention)	Quasi-randomized	N/A	11	10	5	6	54.5455	73.2 (8.6)	Alzheimer’s disease	100	0	0	0	0	10.3 (9.4)	80	4	Severe agitation and aggressive behaviour resulting in hospitalization	Reported for eight participants: risperidone, olanzapine and clozapine	THC (MOC®)	2.5-7.5 mg po BID	NPI, MMSE, CGI	Yes	Yes	Yes	Yes	No	No	10	1	Dysphagia (n=1)	Dysphagia (n=1)
Herrmann et al., 2019	Canada	Community and nursing home	North America	DSM-V	Community and nursing home	Randomized DB PC crossover trial	Randomized	Placebo	38	29	8	30	78.9474	87.0 (10)	Alzheimer’s disease, vascular and mixed	100	0	0	0	0	6.5 (6.8)	45	14	Severe agitation or aggressive behaviour; NPI-agitation ≥ 3	Not explicitly stated, however, 87% were on antidepressants, benzodiazepines, antipsychotics and antiepileptics	Nabilone	1-2 mg po qHs	CMAI, NPI, MMSE, SIB, CGI	Yes	Yes	Yes	Yes	No	No	29	9	Death (n=2), lethargy (n=2), INR (n=1), MI (n=1), cancer (n=1), PTX (n=1), UTI (n=1)	Death (n=2), lethargy (n=2), INR (n=1), MI (n=1), cancer (n=1), PTX (n=1), UTI (n=1)
									208		44.2308			78.225		85.1111	5.88889	7.77778	0.333333	0.888889	11.1875	48.7143													193	15	208
									23.1111					7.025							6.85714	32.0454
									16.5185																										92.7885	7.21154
